# Supplementary material for: Rerouting plant terpene biosynthesis enables momilactone pathway elucidation
Source: Springer Nature journal article supplement (doi:10.1038/s41589-020-00669-3), 2020-10-26
Supplement: 41589_2020_669_MOESM1_ESM.mol [file 41589_2020_669_MOESM1_ESM.mol]

nchembio.A200210810B-comp1.mol
  ChemDraw09032000552D

 20 22  0  0  1  0  0  0  0  0999 V2000
   -2.2914   -0.1480    0.0000 C   0  0  0  0  0  0  0  0  0  0  0  0
   -2.2914   -0.9730    0.0000 C   0  0  0  0  0  0  0  0  0  0  0  0
   -1.5769   -1.3855    0.0000 C   0  0  0  0  0  0  0  0  0  0  0  0
   -0.8624   -0.9730    0.0000 C   0  0  0  0  0  0  0  0  0  0  0  0
   -0.8624   -0.1480    0.0000 C   0  0  0  0  0  0  0  0  0  0  0  0
   -1.5769    0.2645    0.0000 C   0  0  0  0  0  0  0  0  0  0  0  0
   -0.1480   -1.3855    0.0000 C   0  0  0  0  0  0  0  0  0  0  0  0
    0.5665   -0.9730    0.0000 C   0  0  0  0  0  0  0  0  0  0  0  0
    0.5665   -0.1480    0.0000 C   0  0  0  0  0  0  0  0  0  0  0  0
   -0.1480    0.2645    0.0000 C   0  0  0  0  0  0  0  0  0  0  0  0
    1.2810    0.2645    0.0000 C   0  0  0  0  0  0  0  0  0  0  0  0
    1.2810    1.0895    0.0000 C   0  0  0  0  0  0  0  0  0  0  0  0
    0.5665    1.5020    0.0000 C   0  0  0  0  0  0  0  0  0  0  0  0
   -0.1480    1.0895    0.0000 C   0  0  0  0  0  0  0  0  0  0  0  0
   -0.8624    0.6770    0.0000 C   0  0  0  0  0  0  0  0  0  0  0  0
    1.4945    1.8864    0.0000 C   0  0  0  0  0  0  0  0  0  0  0  0
    2.0779    1.3031    0.0000 C   0  0  0  0  0  0  0  0  0  0  0  0
    2.2914    2.0999    0.0000 C   0  0  0  0  0  0  0  0  0  0  0  0
   -1.1644   -2.0999    0.0000 C   0  0  0  0  0  0  0  0  0  0  0  0
   -1.9894   -2.0999    0.0000 C   0  0  0  0  0  0  0  0  0  0  0  0
  1  2  1  0      
  2  3  1  0      
  3  4  1  0      
  4  5  1  0      
  5  6  1  0      
  6  1  1  0      
  4  7  1  0      
  7  8  1  0      
  8  9  2  0      
  9 10  1  0      
 10  5  1  0      
  9 11  1  0      
 11 12  1  0      
 12 13  1  0      
 13 14  1  0      
 14 10  1  0      
  5 15  1  1      
 12 16  1  6      
 12 17  1  1      
 17 18  2  0      
  3 19  1  1      
  3 20  1  6      
M  END
